# Supplementary material for: Ultrafine Ir nanoparticles anchored on carbon nanotubes as efficient bifunctional oxygen catalysts for Zn–air batteries
Source: Royal Society of Chemistry journal article supplement (doi:10.1039/d4cc01465k), 2024-01-01
Supplement: d4cc01465k1.pdf [file d4cc01465k1.pdf]

## Supporting Information

### **Ultrafine Ir nanoparticles anchored on carbon nanotubes as efficient bifunctional oxygen catalysts for Zn-air battery**

Jianglian Wang, Mengdi Ni, Jinjie Qian\*, Yongjie Ge, Dong Cai, Huagui Nie,  
Xuemei zhou\*, Zhi Yang\*

Key Laboratory of Carbon Materials of Zhejiang Province, Wenzhou University,  
Wenzhou 325035, China

E-mail: [zxm.mei@163.com](mailto:zxm.mei@163.com); [jinjieqian@wzu.edu.cn](mailto:jinjieqian@wzu.edu.cn); [yang201079@126.com](mailto:yang201079@126.com)

## **Experimental section**

### **Synthesis of Ir-NC catalysts**

The Ir-NC catalyst was prepared using a top-down synthesis approach. Specifically, 5 mg of Ir(ppy)<sub>3</sub> (the structural formula is shown in **Fig. S1**) and 20 mg of CNTs were combined in a mortar and ground uniformly for 30 minutes before being transferred to a tube furnace. The mixture was then heated at a rate of 5 °C min<sup>-1</sup> until reaching 500 °C, where it was held for 4 hours before naturally cooling. The resulting material was denoted as Ir-NC-500. To facilitate comparative analysis, c-Ir-NC-T samples (c representing initial Ir(ppy)<sub>3</sub> content and T denoting annealing temperature) were synthesized by varying the initial iridium content (0.05 wt.%, 0.1 wt.%, 0.15 wt.%) and annealing temperature (300 °C, 500 °C, 700 °C). This was achieved using a similar synthetic procedure as described earlier, with adjustments made to the initial Ir(ppy)<sub>3</sub> content and annealing temperature for each sample.

### **Material characterization**

Transmission electron microscopy (TEM), high-resolution TEM (HRTEM), and energy-dispersive X-ray spectroscopy (EDS) elemental mapping analyses were conducted using a JEOL-2100F instrument operating at 200 kV. X-ray diffraction (XRD) patterns were obtained with a D/MAX-2400 diffractometer utilizing Cu K $\alpha$  radiation (40 kV, 100 mA,  $\lambda = 1.54056 \text{ \AA}$ ). X-ray photoelectron spectroscopy (XPS) measurements were performed on an ultrahigh-vacuum setup equipped with a monochromatic Al K $\alpha$  X-ray source (10 mA, 15 kV) and a high-resolution Gamdata-Scienta SES 2002 analyzer. Raman spectra were captured using a

Renishaw inVia Raman microscope with a 532 nm Ar-ion laser excitation source. Thermogravimetric analysis (TGA) was carried out in an alumina crucible using the simultaneous Thermal Analysis Modulus, SDT Q600 (TA Instruments) controlled by Advantage for Q Series software. The experiment was conducted under an air atmosphere (flow rate of 100 mL min<sup>-1</sup>) from 40 to 800 °C at a heating rate of 5 °C min<sup>-1</sup>.

### **Electrochemical characterizations**

All the electrochemical tests were performed using a three-electrode system with a saturated calomel electrode (SCE) as the reference electrode and Pt wire as the counter electrode by using a CHI760E electrochemical workstation (CH Instrument Inc). A pre-polished glassy carbon rotating disk electrode (0.196 cm<sup>2</sup>) was utilized for ORR in 0.1 M KOH solution, while a mass loading of 0.56 mg cm<sup>-2</sup> on carbon fiber paper served as the working electrode for OER in 1 M KOH solution. Cyclic Voltammetry (CV) measurements were performed at a scan rate of 10 mV s<sup>-1</sup>, and Linear scan voltammetry (LSV) measurements were recorded within the potential range of 0.2 to -0.8 V (vs. SCE) for ORR and 0.2 to 0.8 V (vs. SCE) for OER at a scan rate of 10 mV s<sup>-1</sup>. Electrochemical impedance spectroscopy (EIS) was conducted at open circuit voltage across a frequency range of 0.01 Hz to 100 kHz.

The electron transfer number (n) was determined from LSV curves on a rotating disk electrode (RDE) with varying rotation speeds using the Koutecky-Levich (K-L)

equation:  $\frac{1}{j} = \frac{1}{B\sqrt{\omega}} + \frac{1}{j_K}$ , where  $j_K$  is the kinetic current and  $\omega$  is the electrode rotating

rate.  $B$  is determined from the slope of the K-L plots according to the Levich equation

as given below:  $B = 0.2nFV^{-1/6}C_{O_2}D_{O_2}^{2/3}$ , where  $n$  represents the transferred

electron number per oxygen molecule.  $F$  is Faraday constant ( $F = 96485 \text{ C mol}^{-1}$ ).

$D_{O_2}$  is the diffusion coefficient of  $O_2$  in 0.1 M KOH ( $D_{O_2} = 1.9 \times 10^{-5} \text{ cm}^2 \text{ s}^{-1}$ ).  $\nu$  is

the kinetic viscosity ( $\nu = 0.01 \text{ cm}^2 \text{ s}^{-1}$ ).  $C_{O_2}$  is the bulk concentration of  $O_2$  ( $C_{O_2} = 1.2$

$\times 10^{-6} \text{ mol cm}^{-3}$ ). The constant 0.2 is adopted when the rotation speed is expressed in

rpm.

The  $HO_2^-$ -% and transferred electron number per oxygen molecule ( $n$ ) were determined by the followed equations based on rotating ring-disc electrode (RRDE)

measurements:  $H_2O_2\% = 200 * \frac{I_R/N}{I_D + I_R/N}$  and  $n = 4 * \frac{I_D}{I_D + \frac{I_R}{N}}$ , where  $I_D$  is disk

current,  $I_R$  is ring current, and  $N$  is current collection efficiency of the Pt ring.  $N$  was

determined to be 0.37.

To extract the apparent activation energy ( $E_{app}$ ) of OER, LSV was measured in 1mol KOH solution at different temperatures (35°C, 40°C, 45°C, 50°C, 55°C). For

heterogeneous electrocatalytic reactions, the current density can be expressed by the

apparent activation energy  $E_{app}$  in the Arrhenius equation, according to Arrhenius

equation:  $j = A_{app} \exp(-\frac{E_{app}}{RT})$ ,  $A_{app}$  is the apparent prefactor,  $R$  is the ideal gas

constant ( $8.314 \text{ J K}^{-1}\text{mol}^{-1}$ ), and  $T$  is the temperature in Kelvin (K). Therefore, it can

be further calculated by fitting the slope of the Arrhenius diagram using the equation :

$$\left| \frac{\Delta(\ln_{10}j)}{\Delta(1/T)} \right|_{\eta} = -\frac{E_{app}}{R}$$

### **Fabrication of Zn-air batteries**

In the Zn-air battery test, the air electrode was prepared by coating the catalyst ink onto carbon paper (CP) and drying at 40 °C for 6 hours with a mass loading of 5 mg cm<sup>-2</sup>. The catalyst ink was prepared by mixing 5 mg of catalyst with deionized water, ethyl alcohol, and Nafion under sonication. A Zn plate served as the anode, and both electrodes were assembled into a homemade Zn-air battery using 6 M KOH aqueous solution as the electrolyte. IrO<sub>2</sub> and 20 wt% Pt/C in a 1:1 mass ratio were used as control catalysts. Polarization curves were measured at a scan rate of 10 mV s<sup>-1</sup>. Specific discharge capacity was normalized to the consumed Zn plate mass based on galvanostatic discharge results. The Zn-air battery underwent 300 cycles of 5-minute discharge and 5-minute charge at 10 mA cm<sup>-2</sup>.

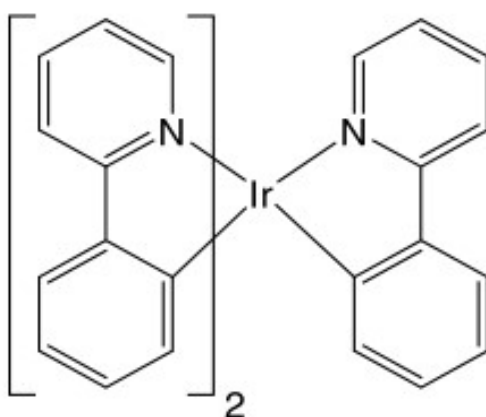

**Fig. S1.** The molecular structural formula of Ir(ppy)<sub>3</sub>.

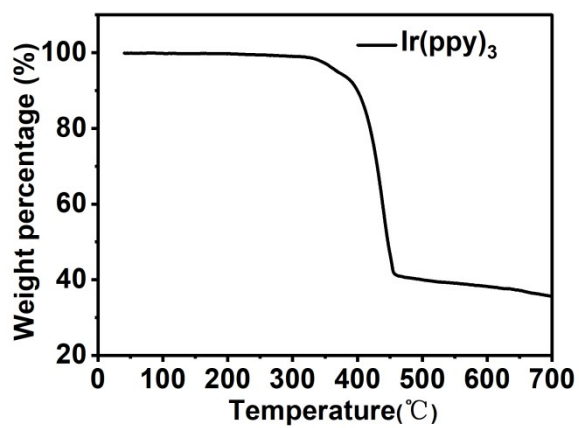

**Fig. S2.** TGA curves for Ir(ppy)<sub>3</sub>.

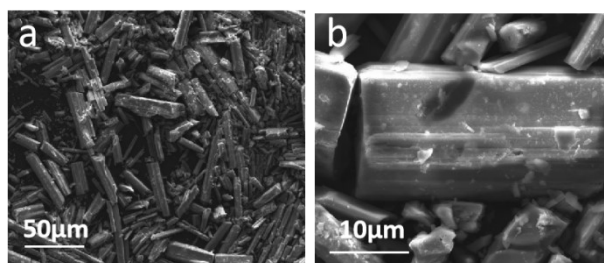

**Fig.S3.** SEM image of the raw Ir(ppy)<sub>3</sub> (a) and Ir(ppy)<sub>3</sub>-500 without CNTs supports(b).

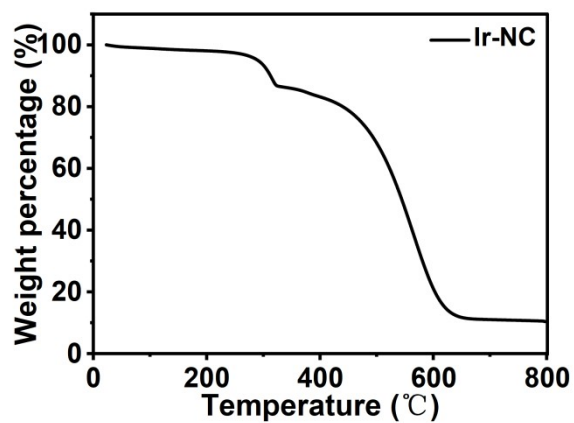

Fig. S4 TGA curves of Ir-NC-500.

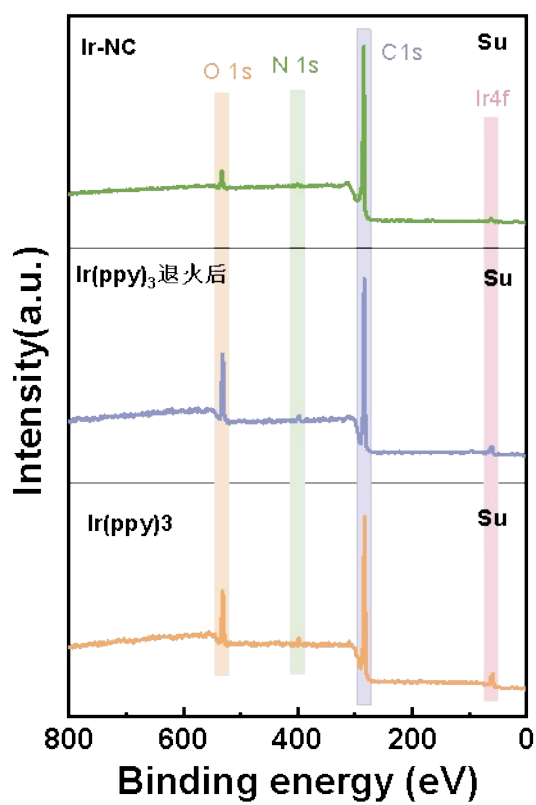

Fig. S5 The full XPS spectroscopy of the Ir(ppy)<sub>3</sub>, Ir(ppy)<sub>3</sub>-C, Ir-NC catalyst.

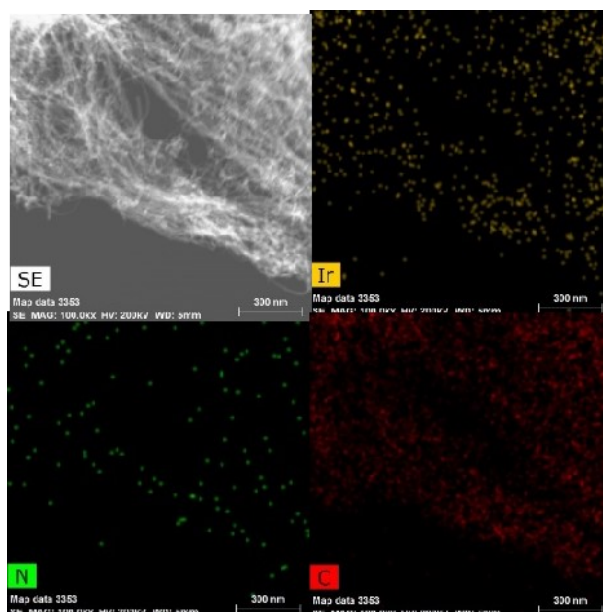

Fig. S6 EDX Mapping (Ir yellow, N green, C red) of the Ir-NC catalyst.

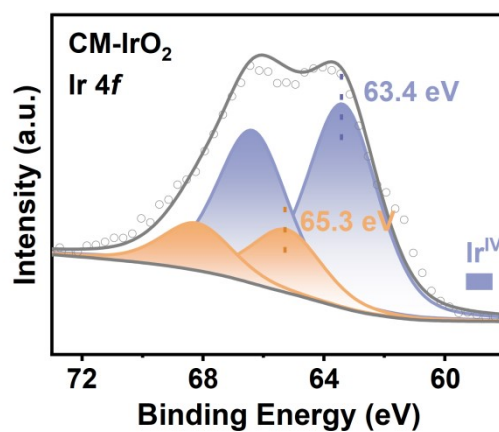

Fig. S7 Ir4f of CM-IrO<sub>2</sub>.

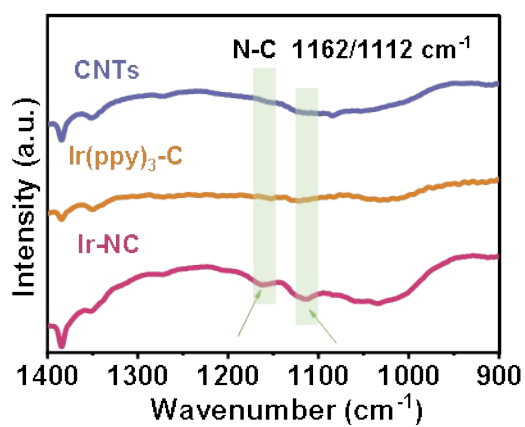

Fig. S8 Infrared images of CNTs, Ir(ppy)<sub>3</sub>-C, Ir-NC.



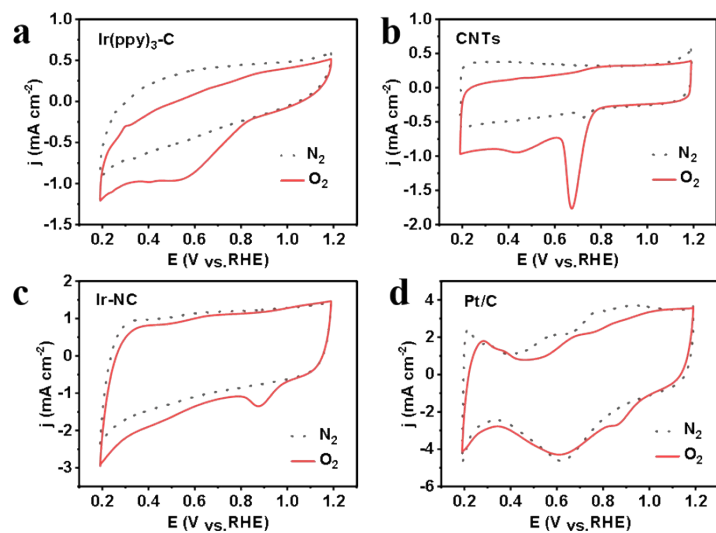

**Fig. S9** CV curves for CNTs, Ir(ppy)<sub>3</sub>-C, Ir-NC and Pt/C.

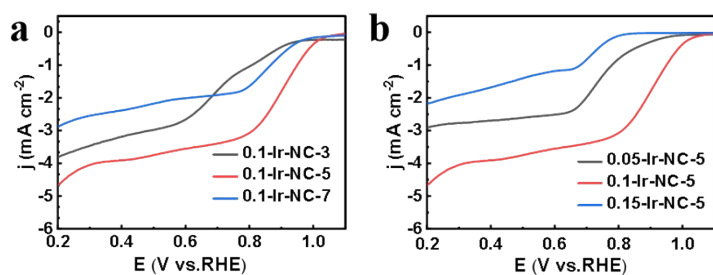

**Fig. S10** ORR LSV curves obtained in O<sub>2</sub>-saturated 0.1 mol L<sup>-1</sup> KOH at 1600 rpm.

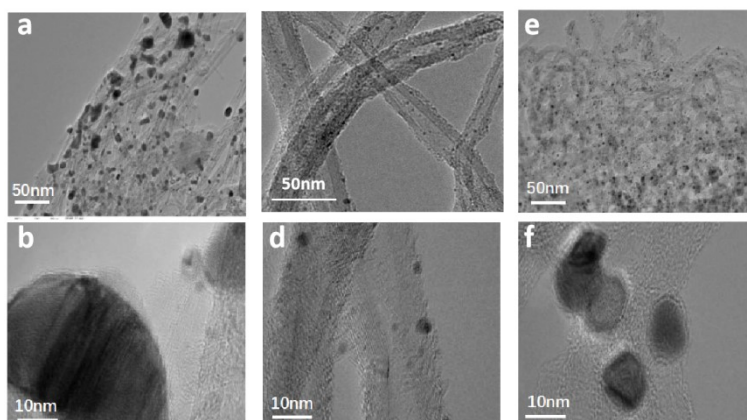

**Fig. S11** TEM images of Ir-NC-300 (a, b), Ir-NC-500 (c, d) and Ir-NC-700 (e, f).

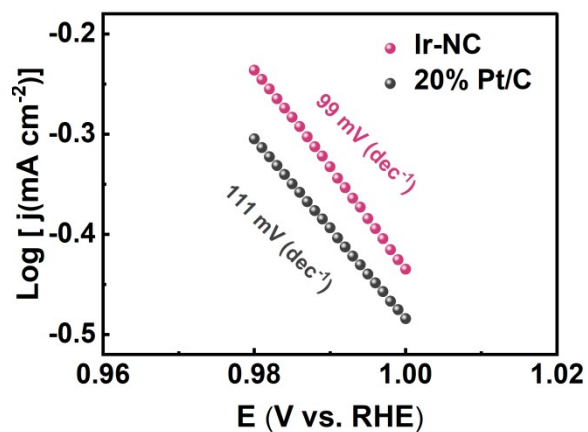

Fig. S12 Tafel slopes of Ir-NC and Pt/C for ORR.

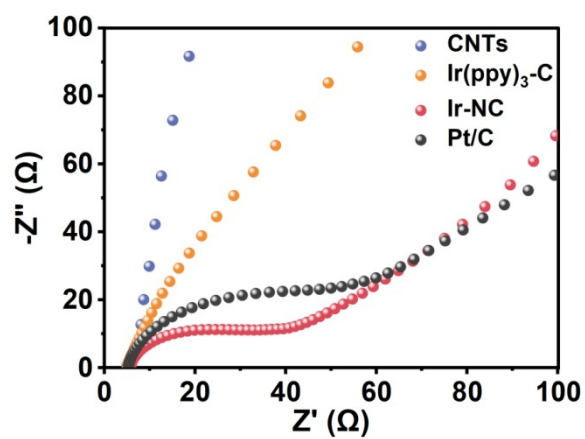

Fig. S13 Nyquist plots at open circuit voltage of CNTs,  $\text{Ir(ppy)}_3\text{-C}$ , Ir-NC and Pt/C

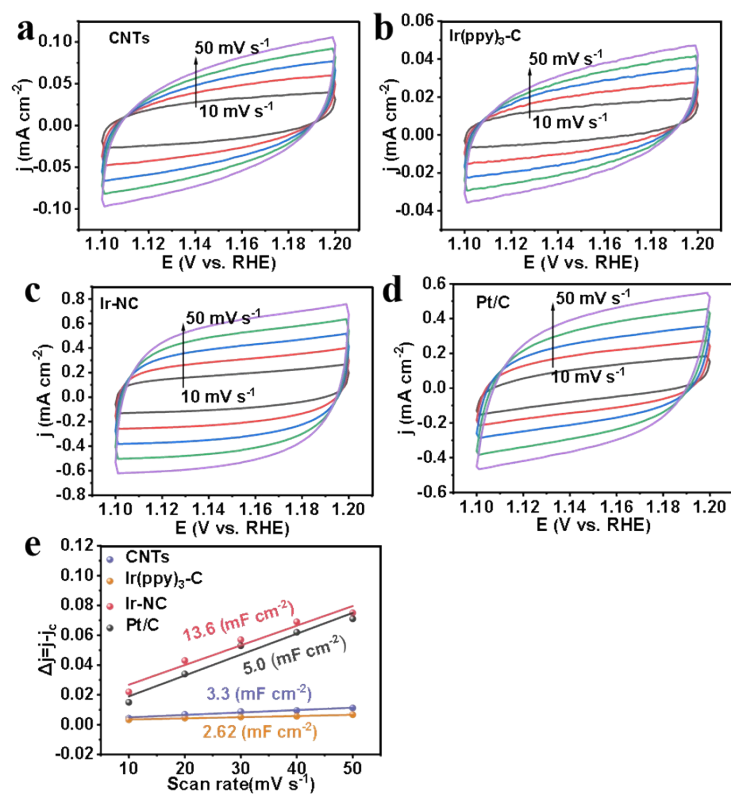

**Fig. S14.** Cycle voltammograms for the (a) CNTs, (b) Ir(ppy)<sub>3</sub>-C (c) Ir-NC and d) Pt/C in the non-faradaic capacitance current range at scan rates of 10, 20, 30, 40 and 50 Mv s<sup>-1</sup> in 0.1M KOH; (e) Charging current density differences plotted versus scan rate. The linear slope, equivalent to twice the double-layer capacitance  $C_{dl}$ , was use to represent the ECSA.

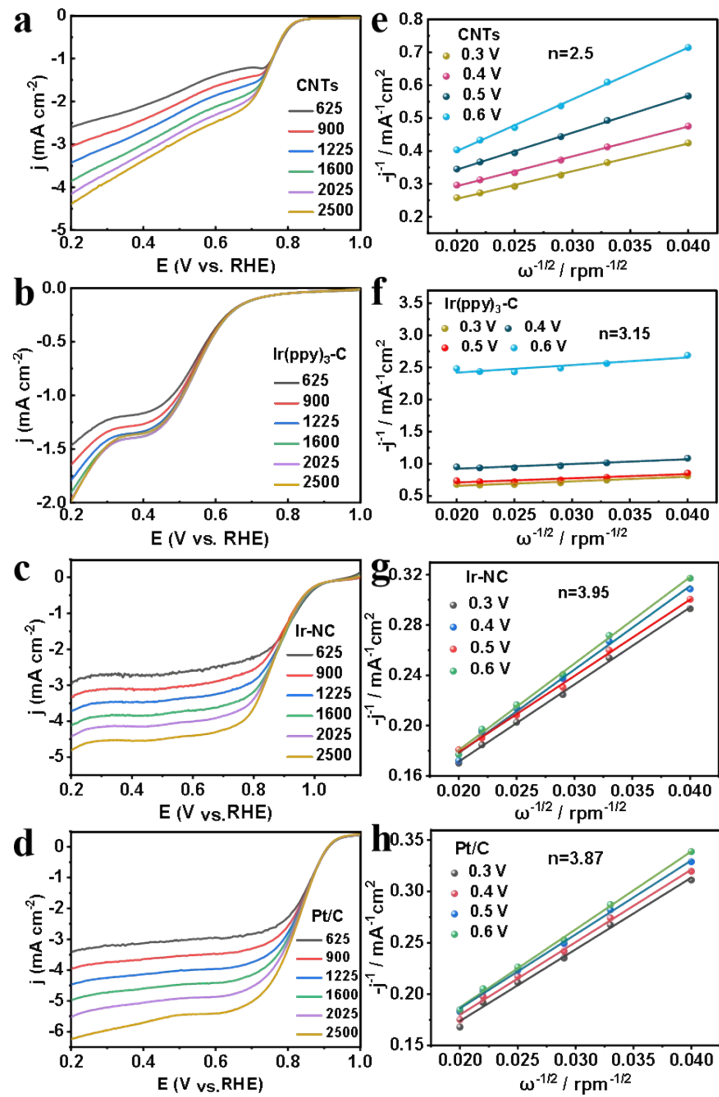

**Fig. S15.** ORR LSV curves at various rotating speeds from 625 to 2500 rpm of (a) CNTs, (b)  $\text{Ir(ppy)}_3\text{-C}$  and (c) Ir-NC and (d) Pt/C in 0.1 M KOH. The K-L plots at various potentials within 0.3-0.6V of (e) CNTs, (f)  $\text{Ir(ppy)}_3\text{-C}$  and (g) Ir-NC and (h) Pt/C.

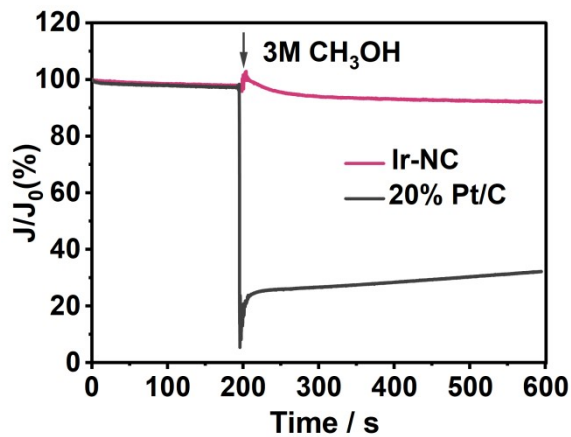

**Fig. S16.** Chronoamperometric responses of Ir-NC and Pt/C tolerance to carbon monoxide poisoning in oxygen-saturated 0.1 M KOH.

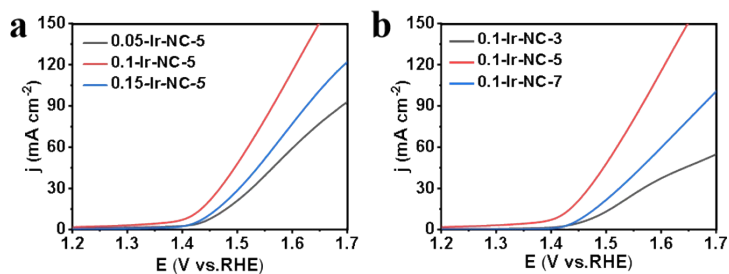

**Fig. S17** (a and b) OER LSV curves in 1M KOH.

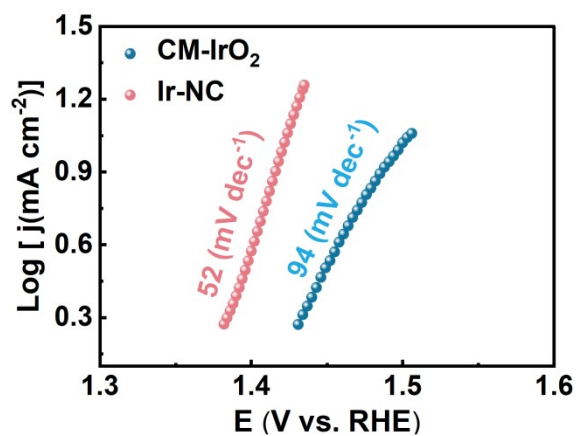

**Fig. S18.** Tafel slopes of Ir-NC and CM-IrO<sub>2</sub> for OER.

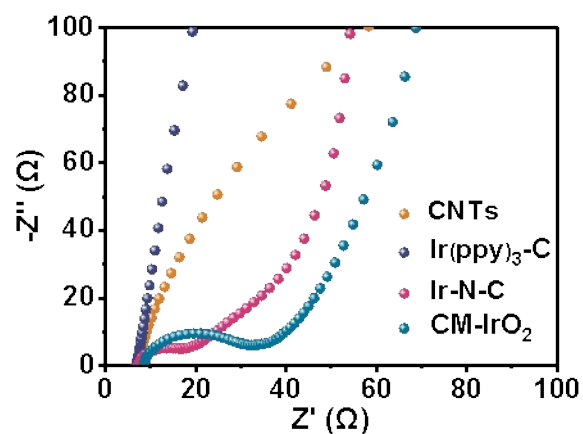

**Fig. S19** Nyquist plots at open circuit voltage of CNTs, Ir(ppy)<sub>3</sub>-C, Ir-N-C and CM-IrO<sub>2</sub>.

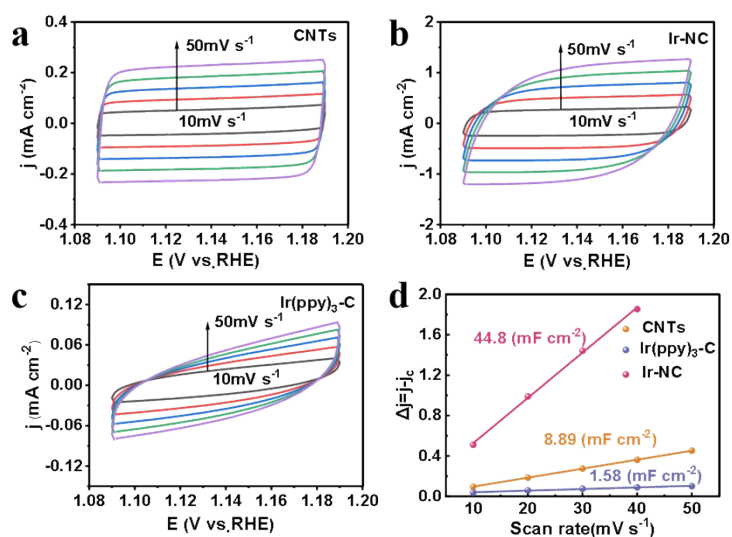

**Fig. S20.** CVs for the (a) CNTs, (b) Ir(ppy)<sub>3</sub>-C and (c) Ir-N-C in the non-faradaic capacitance current range at scan rates of 10, 20, 30, 40 and 50 mV s<sup>-1</sup> in 1 M KOH; (d) Charging current density differences plotted versus scan rate. The linear slope, equivalent to twice the double-layer capacitance  $C_{dl}$ , was used to represent the ECSA.

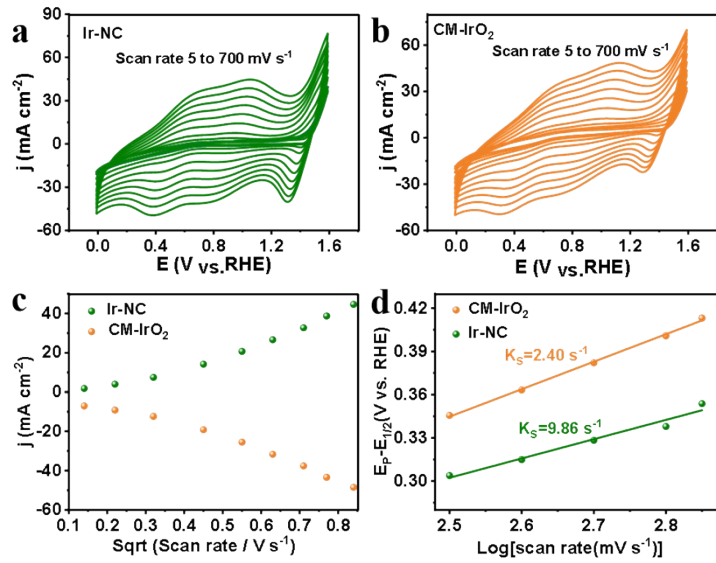

**Fig. S21** Electrochemical redox coefficients of Ir-NC (a) and CM-IrO<sub>2</sub> (b), (c) The relationship between oxidation current, reduction current and sweep speed square root of Ir-NC and CM-IrO<sub>2</sub>, (d) K<sub>s</sub> of for Ir-NC and CM-IrO<sub>2</sub>.

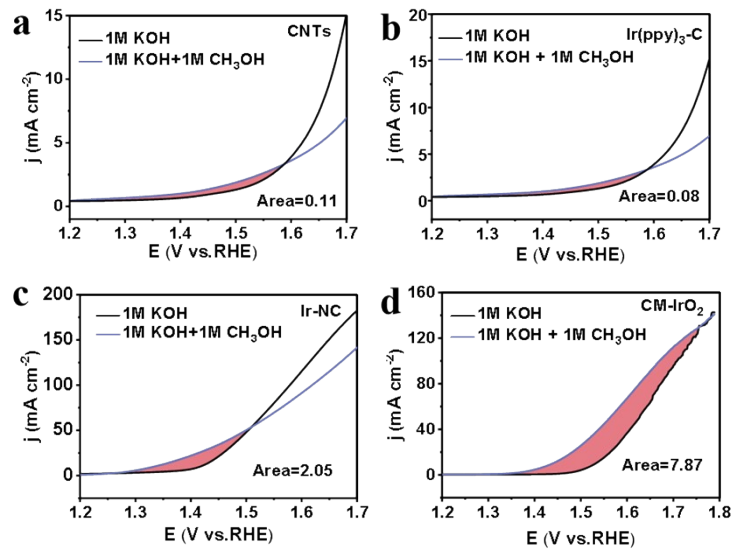

**Fig. S22** OER LSV curves for (a) CNTs, (b) Ir(ppy)<sub>3</sub>-C and (c) Ir-NC in 1M KOH in the presence or absence of methanol (1.0 M).

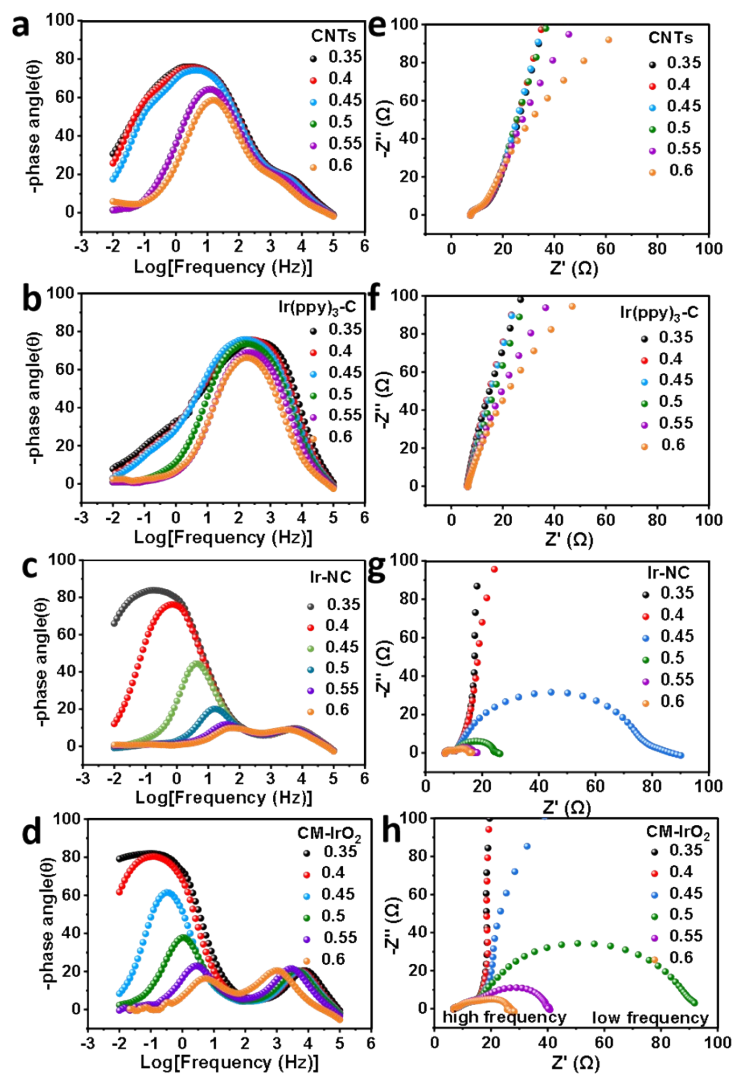

**Fig. S23** Nyquist plots and the corresponding Bode absolute impedance plots of (a) CNTs, (b) Ir(ppy)<sub>3</sub>-C, (c) Ir-NC and (d) CM-IrO<sub>2</sub> acquired at 0.35, 0.4, 0.45, 0.5, 0.55, and 0.60 V vs. Hg/HgO, respectively in 1.0 M KOH; (e-h) The c of the same.



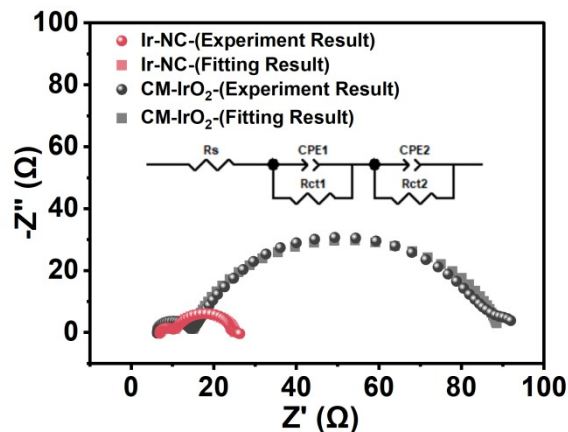

**Fig. S24** Nyquist plots of CM-IrO<sub>2</sub> and Ir-NC at 0.5 V vs SCE.

Table S3 All values derived from Fig.S21.

| Sample              | Potential<br>(V vs SCE) | R <sub>s</sub> | R <sub>ct1</sub> | CPE <sub>1</sub><br>(μMho) | R <sub>ct2</sub> | CPE <sub>2</sub><br>(mMho) |
|---------------------|-------------------------|----------------|------------------|----------------------------|------------------|----------------------------|
| Ir/N-CNTs           | 0.5                     | 6.92           | 3.49             | 47.5                       | 14.72            | 17.6                       |
| CM-IrO <sub>2</sub> | 0.5                     | 6.26           | 8.61             | 20.6                       | 74.48            | 59.0                       |

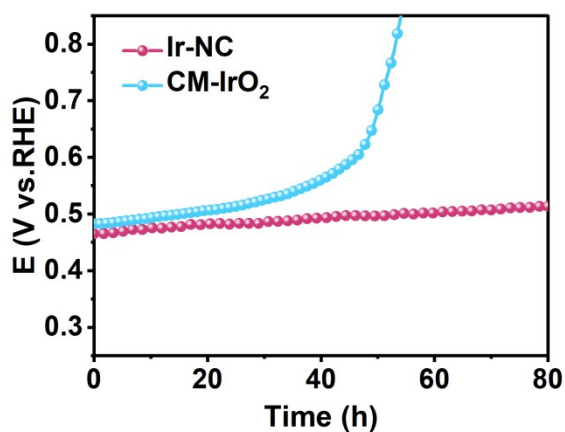

**Fig. S25** Electrochemical stability of Ir-NC and CM-IrO<sub>2</sub> was measured at the current density of 10 mA cm<sup>-2</sup>.

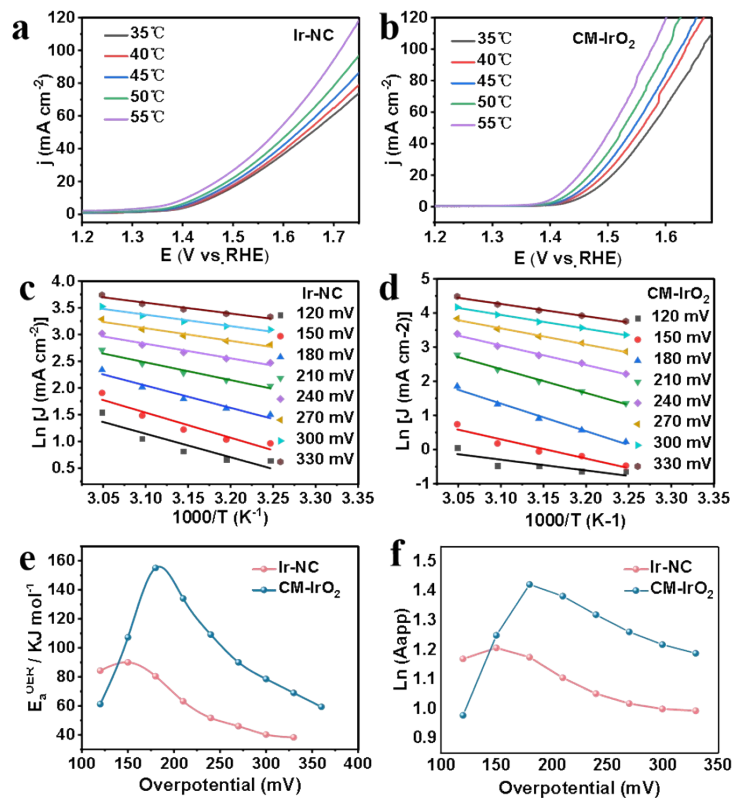

**Fig. S26** Temperature-dependent LSVs of (a) Ir-NC and (b) CM-IrO<sub>2</sub> measured in 1 M KOH with a sweep rate of 10 mV s<sup>-1</sup>. Arrhenius plots of (c) Ir-NC and (d) CM-IrO<sub>2</sub>, respectively, at overpotentials 120, 150, 180, 210, 240, 270, 300 and 330 mV, respectively. (e) The corresponding  $E_{app}$  data point are calculated from LSV curves recorded at different temperatures (f) The logarithm of pre-exponential factor  $A_{app}$  derived from the intercept during the extraction of  $E_{app}$  for Ir-NC and CM-IrO<sub>2</sub> catalysts at fixed overpotentials using the Arrhenius plots.

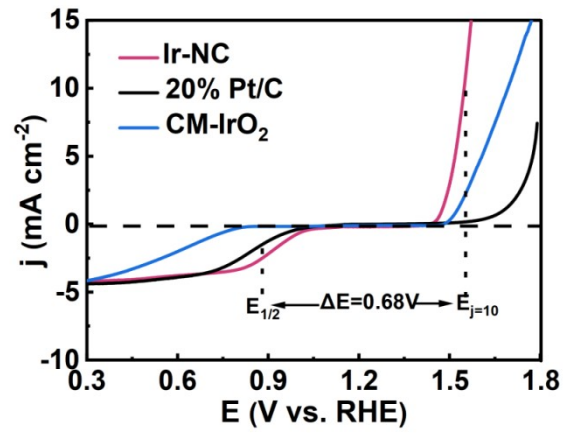

**Fig. S27** Bifunctional catalytic activities of electrocatalysts toward ORR and OER.

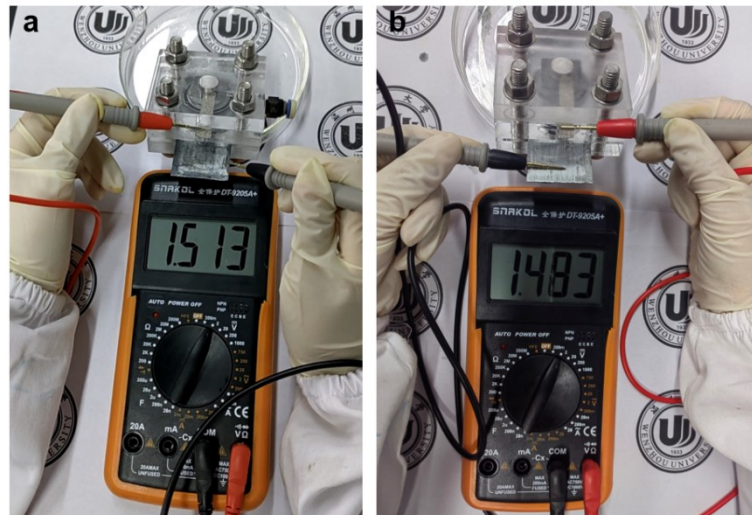

**Fig. S28.** The OCP for Ir-NC (a) and Pt/C (b) by measured with a multimeter.

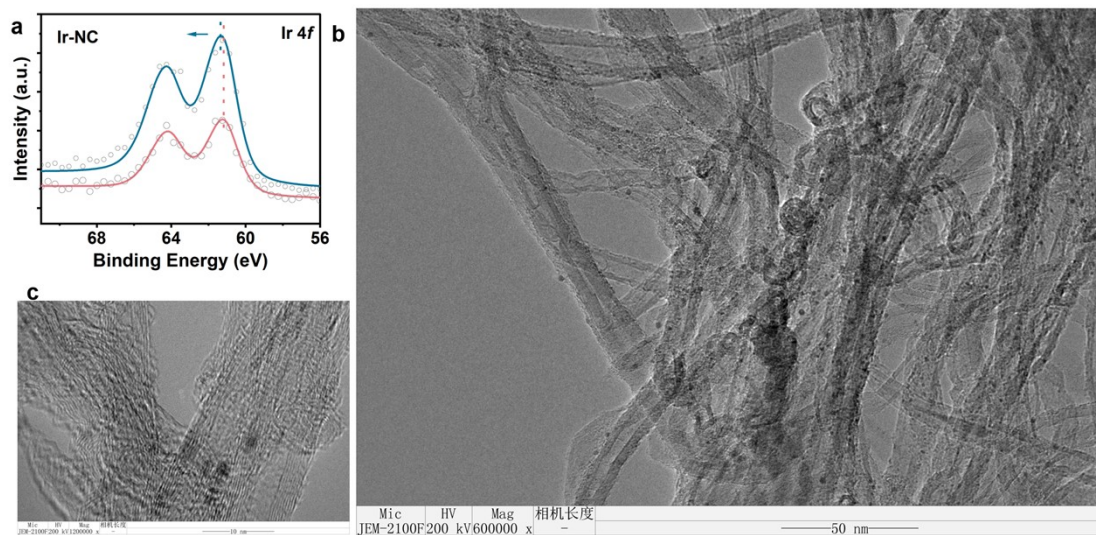

**Fig S29.** XPS (a) and TEM (b,c) for Ir-NC after the stability test.

**Table S1**  $E_{1/2}$  values of Ir-NC and Ir-based electrocatalysts towards ORR in 0.1 M KOH

| Electrocatalyst          | electrolyte      | $E_{1/2}$ (V)/ $\eta$ (mV) | Ref.             |
|--------------------------|------------------|----------------------------|------------------|
| <b>Ir-NCNT</b>           | <b>0.1 M KOH</b> | <b>0.875</b>               | <b>This work</b> |
| mIr NVs                  | 0.1 M KOH        | 0.873                      | [1]              |
| Ir@NHCSs                 | 0.1 M KOH        | 0.76                       | [2]              |
| Ir/A-rG-O                | 0.1 M KOH        | 0.78                       | [3]              |
| mIrAu NVs                | 0.1 M KOH        | 0.893                      | [1]              |
| Au@Ir CSNWs              | 0.1 M KOH        | 0.883                      | [4]              |
| 2%IrO <sub>2</sub> @CNTs | 0.1M KOH         | 0.796                      | [5]              |
|                          | 1M KOH           | 217                        |                  |
| Ir@NG-750                | 0.1M KOH         | 0.865                      | [6]              |
|                          | 1M KOH           | 273                        |                  |

**Table S2** Comparison of the corresponding overpotential of Ir-NC and other Ir-based OER catalysts reported at 10 mA cm<sup>-2</sup> under 1 M KOH.

| Electrocatalyst | electrolyte    | $\eta$ (mV) ( $j=10\text{mA cm}^{-2}$ ) | Ref.             |
|-----------------|----------------|-----------------------------------------|------------------|
| <b>Ir-NCNT</b>  | <b>1 M KOH</b> | <b>188</b>                              | <b>This work</b> |
| Ir NSG          | 1 M KOH        | 220                                     | [7]              |
| Ir @N-rGO       | 1 M KOH        | 260                                     | [8]              |
| Ir@Ni-NDC       | 1 M KOH        | 210                                     | [9]              |
| Ir@N-G-600      | 1 M KOH        | 314                                     | [10]             |
| Ir@N-G-750      | 1 M KOH        | 303                                     | [6]              |

**Table S4** Comparison of Zn-air battery performance between Ir-NC and other noble metal electrocatalysts.

| Electrocatalyst                                                                            | OCPT(V)     | Power density<br>(mW cm <sup>-2</sup> ) | specific capacity<br>(mAh g <sup>-1</sup> <sub>Zn</sub> )<br>@ xx mA cm <sup>-2</sup> | Ref              |
|--------------------------------------------------------------------------------------------|-------------|-----------------------------------------|---------------------------------------------------------------------------------------|------------------|
| <b>Ir-NCNTs</b>                                                                            | <b>1.51</b> | <b>157</b>                              | <b>803@10</b>                                                                         | <b>This work</b> |
| SA-Ir/NC                                                                                   | 1.42        | 90.4                                    | 776.8 @ 20                                                                            | [11]             |
| Ir@Co <sub>3</sub> O <sub>4</sub>                                                          | /           | 163                                     | 712 @ 20                                                                              | [12]             |
| Pd/Fe-N-C                                                                                  | 1.42        | /                                       | 775 @10                                                                               | [13]             |
| La <sub>0.7</sub> Sr <sub>0.3</sub> Co <sub>0.9</sub> Pd <sub>0.03</sub> O <sub>2.85</sub> | 1.50        | 52                                      | 740 @10                                                                               | [14]             |
| Pt/NBF-ReS <sub>2</sub> /Mo <sub>2</sub> CTx                                               | 1.41        | 180                                     | 786@50                                                                                | [15]             |
| ZIF-67@Pt/CB                                                                               | 1.42        | 150                                     | /                                                                                     | [16]             |
| CuPt-NC                                                                                    | 1.4         | 253.8                                   | 560@20                                                                                | [17]             |
| SA-PtCoF                                                                                   | 1.31        | 125                                     | 808 @10<br>806@20                                                                     | [18]             |
| Au@Co <sub>2</sub> N <sub>0.67</sub> /3D-NGr                                               | 1.52        | 142.8                                   | /                                                                                     | [19]             |

## References

- [1] C. Li, Y. Xu, Z. Dai, S. Liu, S. Yu, Z. Wang, X. Li, L. Wang, H. Wang, Bimetallic IrAu mesoporous nanovesicles, *Chem. Eng. J.* 395 (2020) 125135.
- [2] J. Shen, H. Wu, W. Sun, J. Qiao, H. Cai, Z. Wang, K. Sun, In-situ nitrogen-doped hierarchical porous hollow carbon spheres anchored with iridium nanoparticles as efficient cathode catalysts for reversible lithium-oxygen batteries, *Chem. Eng. J.* 358 (2019) 340-350.
- [3] K. Choi, S. Lee, Y. Shim, J. Oh, S. Kim, S. Park, Electrocatalytic performances of N-doped graphene with anchored iridium species in oxygen reduction reaction, *2D Materials.* 2 (3) (2015) 034019.
- [4] Q. Xue, H.-Y. Sun, Y.-N. Li, M.-J. Zhong, F.-M. Li, X. Tian, P. Chen, S.-B. Yin, Y. Chen, Au@Ir core-shell nanowires towards oxygen reduction reaction, *Chem. Eng. J.* 421 (2021) 129760.
- [5] X. Wen, L. Bai, M. Li, J. Guan, Ultrafine iridium oxide supported on carbon nanotubes for efficient catalysis of oxygen evolution and oxygen reduction reactions, *Materials Today Energy.* 10 (2018) 153-160.
- [6] Q. Zhang, Z. Duan, Y. Wang, L. Li, B. Nan, J. Guan, Atomically dispersed iridium catalysts for multifunctional electrocatalysis, *J. Mater. Chem. A.* 8 (37) (2020) 19665-19673.
- [7] Q. Wang, C.-Q. Xu, W. Liu, S.-F. Hung, H. Bin Yang, J. Gao, W. Cai, H. M. Chen, J. Li, B. Liu, Coordination engineering of iridium nanocluster bifunctional electrocatalyst for highly efficient and pH-universal overall water splitting, *Nat. Commun.* 11 (1) (2020) 4246.
- [8] W. Yao, X. Jiang, Y. Li, C. Zhao, L. Ding, D. Sun, Y. Tang, N-doped graphene anchored ultrasmall Ir nanoparticles as bifunctional electrocatalyst for overall water splitting, *Green Energy Environ.* 7 (5) (2022) 1111-1118.
- [9] J. Yang, Y. Shen, Y. M. Sun, J. H. Xian, Y. J. Long, G. Q. Li, Ir Nanoparticles Anchored on Metal-Organic Frameworks for Efficient Overall Water Splitting under pH-Universal Conditions, *Angew. Chem. Int. Ed.* 62 (17) (2023).
- [10] L. Yi, B. Feng, N. Chen, W. Li, J. Li, C. Fang, Y. Yao, W. Hu, Electronic interaction boosted electrocatalysis of iridium nanoparticles on nitrogen-doped graphene for efficient overall water splitting in acidic and alkaline media, *Chem. Eng. J.* 415 (2021) 129034.
- [11] X. Luo, M. Yang, W. Song, Q. Fang, X. Wei, L. Jiao, W. Xu, Y. Kang, H. Wang, N. Wu, W. Gu, L. Zheng, L. Hu, C. Zhu, Neutral Zn-Air Battery Assembled with Single-Atom Iridium Catalysts for Sensitive Self-Powered Sensing System, *Adv. Funct. Mater.* 31 (24) (2021) 2101193.
- [12] Y. Dai, J. Yu, J. Wang, Z. Shao, D. Guan, Y.-C. Huang, M. Ni, Bridging the Charge Accumulation and High Reaction Order for High-Rate Oxygen Evolution and Long Stable Zn-Air Batteries, *Adv. Funct. Mater.* 32 (24) (2022) 2111989.
- [13] J. Chen, Z. Wang, C. Yang, G. Zou, S. Liu, Z. Sun, L. Wang, R. Li, K. Qu, W. Kang, Electrocatalytic Oxygen Reduction Reaction by the Pd/Fe-NC Catalyst and Application in a Zn-Air Battery, *Catalysts* 12 (2022) 1640.
- [14] R. Majee, T. Das, S. Chakraborty, S. Bhattacharyya, Shaping a Doped Perovskite Oxide with Measured Grain Boundary Defects to Catalyze Bifunctional Oxygen Activation for a Rechargeable Zn-Air Battery, *ACS Appl. Mater. Interfaces.* 12 (36) (2020) 40355-40363.
- [15] M. Yi, N. Li, B. Lu, L. Li, Z. Zhu, J. Zhang, Single-atom Pt decorated in heteroatom (N, B, and F)-doped ReS<sub>2</sub> Grown on Mo<sub>2</sub>CTx for efficient pH-universal hydrogen evolution reaction and flexible Zn-air batteries, *Energy Storage Materials.* 42 (2021) 418-429.

- [16] J. Li, Z. Meng, D. J. L. Brett, P. R. Shearing, N. T. Skipper, I. P. Parkin, S. Gadipelli, High-Performance Zinc–Air Batteries with Scalable Metal–Organic Frameworks and Platinum Carbon Black Bifunctional Catalysts, *ACS Appl. Mater. Interfaces*. 12 (38) (2020) 42696–42703.
- [17] V. M. Dhavale, S. Kurungot, Cu–Pt Nanocage with 3-D Electrocatalytic Surface as an Efficient Oxygen Reduction Electrocatalyst for a Primary Zn–Air Battery, *ACS Catal.* 5 (3) (2015) 1445–1452.
- [18] Z. Li, W. Niu, Z. Yang, N. Zaman, W. Samarakoon, M. Wang, A. Kara, M. Lucero, M. V. Vyas, H. Cao, H. Zhou, G. E. Sterbinsky, Z. Feng, Y. Du, Y. Yang, Stabilizing atomic Pt with trapped interstitial F in alloyed PtCo nanosheets for high-performance zinc-air batteries, *EES*. 13 (3) (2020) 884–895.
- [19] D. C. Nguyen, T. L. L. Doan, S. Prabhakaran, D. H. Kim, N. H. Kim, J. H. Lee, Rational construction of Au@Co<sub>2</sub>N<sub>0.67</sub> nanodots-interspersed 3D interconnected N-graphene hollow sphere network for efficient water splitting and Zn-air battery, *Nano Energy*. 89 (2021) 106420.
